# Supplementary material for: Foliar mycoendophytome of an endemic plant of the Mediterranean biome (Myrtus communis ) reveals the dominance of basidiomycete woody saprotrophs
Source: PeerJ journal article supplement (doi:10.7717/peerj.10487), 2020-12-03
Supplement: Supplementary_Material_2._Rules_for_identification_of_fungal_OTUs.pdf [file Supplementary_Material_2._Rules_for_identification_of_fungal_OTUs.pdf]

```
if (similarity >= 97):
    return genus                #genus
elif (similarity < 97) and (similarity >= 95):
    return family              #family
elif (similarity < 95) and (similarity >= 90):
    return order               #order
elif (similarity < 90) and (similarity >= 85):
    return class               #class
elif (similarity < 85) and (similarity >= 80):
    return phylo               #phylum
elif (dado_id < 80):
    return kingdom             #kingdom
end
```
